# Supplementary material for: Radiological Investigation on Sediments: A Case Study of Wadi Rod Elsayalla the Southeastern Desert of Egypt
Source: MDPI journal article supplement (doi:10.3390/app112411884), 2021-12-14
Supplement: s1 [file s1]

**Table S1.** The concentrations of radionuclides  $^{238}\text{U}$ ,  $^{232}\text{Th}$ , and  $^{40}\text{K}$  and the radiological hazard indices.

| Sample | U-238<br>(Bq/kg) | Th-232<br>(Bq/kg) | K-40<br>(Bq/kg) | R <sub>eq</sub><br>(Bq/kg) | H <sub>in</sub> | H <sub>ex</sub> | I <sub>γ</sub> | D <sub>air</sub><br>(nG/h) | AED <sub>out</sub><br>(mSv) | AED <sub>in</sub><br>(mSv) | AGDE<br>(mSv) | ELCR   |
|--------|------------------|-------------------|-----------------|----------------------------|-----------------|-----------------|----------------|----------------------------|-----------------------------|----------------------------|---------------|--------|
| S1     | 56               | 97                | 1033            | 274                        | 0.9             | 0.7             | 1.0            | 126.6                      | 0.16                        | 0.6                        | 0.90          | 0.0005 |
| S2     | 95               | 146               | 1127            | 390                        | 1.3             | 1.1             | 1.4            | 178.2                      | 0.22                        | 0.9                        | 1.26          | 0.0008 |
| S3     | 77               | 74                | 939             | 255                        | 0.9             | 0.7             | 0.9            | 118.5                      | 0.15                        | 0.6                        | 0.84          | 0.0005 |
| S4     | 77               | 67                | 939             | 244                        | 0.9             | 0.7             | 0.9            | 114.1                      | 0.14                        | 0.6                        | 0.81          | 0.0005 |
| S5     | 42               | 151               | 1033            | 338                        | 1.0             | 0.9             | 1.2            | 153.2                      | 0.19                        | 0.8                        | 1.09          | 0.0007 |
| S6     | 40               | 71                | 1033            | 221                        | 0.7             | 0.6             | 0.8            | 103.8                      | 0.13                        | 0.5                        | 0.75          | 0.0004 |
| S7     | 51               | 76                | 908             | 229                        | 0.8             | 0.6             | 0.8            | 106.2                      | 0.13                        | 0.5                        | 0.76          | 0.0005 |
| S8     | 42               | 72                | 908             | 215                        | 0.7             | 0.6             | 0.8            | 100.3                      | 0.12                        | 0.5                        | 0.72          | 0.0004 |
| S9     | 42               | 58                | 908             | 195                        | 0.6             | 0.5             | 0.7            | 91.9                       | 0.11                        | 0.5                        | 0.66          | 0.0004 |
| S10    | 53               | 73                | 720             | 213                        | 0.7             | 0.6             | 0.8            | 98.2                       | 0.12                        | 0.5                        | 0.70          | 0.0004 |
| S11    | 59               | 63                | 908             | 220                        | 0.8             | 0.6             | 0.8            | 102.9                      | 0.13                        | 0.5                        | 0.73          | 0.0004 |
| S12    | 43               | 75                | 783             | 211                        | 0.7             | 0.6             | 0.8            | 97.4                       | 0.12                        | 0.5                        | 0.69          | 0.0004 |
| S13    | 56               | 68                | 1002            | 230                        | 0.8             | 0.6             | 0.9            | 107.7                      | 0.13                        | 0.5                        | 0.77          | 0.0005 |
| S14    | 77               | 92                | 908             | 278                        | 1.0             | 0.8             | 1.0            | 128.3                      | 0.16                        | 0.6                        | 0.91          | 0.0006 |
| S15    | 51               | 75                | 876             | 226                        | 0.7             | 0.6             | 0.8            | 104.7                      | 0.13                        | 0.5                        | 0.75          | 0.0004 |
| S16    | 69               | 109               | 1158            | 314                        | 1.0             | 0.8             | 1.2            | 145.2                      | 0.18                        | 0.7                        | 1.03          | 0.0006 |
| S17    | 49               | 76                | 876             | 226                        | 0.7             | 0.6             | 0.8            | 104.9                      | 0.13                        | 0.5                        | 0.75          | 0.0005 |
| S18    | 35               | 86                | 1096            | 243                        | 0.7             | 0.7             | 0.9            | 113.1                      | 0.14                        | 0.6                        | 0.81          | 0.0005 |
| S19    | 41               | 73                | 1096            | 229                        | 0.7             | 0.6             | 0.9            | 107.6                      | 0.13                        | 0.5                        | 0.77          | 0.0005 |
| S20    | 43               | 62                | 1096            | 216                        | 0.7             | 0.6             | 0.8            | 102.2                      | 0.13                        | 0.5                        | 0.74          | 0.0004 |
| S21    | 32               | 62                | 814             | 183                        | 0.6             | 0.5             | 0.7            | 85.5                       | 0.10                        | 0.4                        | 0.61          | 0.0004 |
| S22    | 52               | 67                | 1064            | 230                        | 0.8             | 0.6             | 0.9            | 108.1                      | 0.13                        | 0.5                        | 0.77          | 0.0005 |
| S23    | 64               | 87                | 908             | 258                        | 0.9             | 0.7             | 1.0            | 119.4                      | 0.15                        | 0.6                        | 0.85          | 0.0005 |
| S24    | 67               | 63                | 908             | 227                        | 0.8             | 0.6             | 0.8            | 106.3                      | 0.13                        | 0.5                        | 0.76          | 0.0005 |
| S25    | 51               | 74                | 939             | 229                        | 0.8             | 0.6             | 0.9            | 106.8                      | 0.13                        | 0.5                        | 0.76          | 0.0005 |
| S26    | 59               | 86                | 845             | 247                        | 0.8             | 0.7             | 0.9            | 113.8                      | 0.14                        | 0.6                        | 0.81          | 0.0005 |
| S27    | 41               | 68                | 814             | 200                        | 0.7             | 0.5             | 0.7            | 93.1                       | 0.11                        | 0.5                        | 0.66          | 0.0004 |
| S28    | 75               | 91                | 845             | 270                        | 0.9             | 0.7             | 1.0            | 124.4                      | 0.15                        | 0.6                        | 0.88          | 0.0005 |
| S29    | 41               | 86                | 845             | 229                        | 0.7             | 0.6             | 0.8            | 105.5                      | 0.13                        | 0.5                        | 0.75          | 0.0005 |
| S30    | 61               | 86                | 689             | 236                        | 0.8             | 0.6             | 0.9            | 107.9                      | 0.13                        | 0.5                        | 0.76          | 0.0005 |
| S31    | 44               | 83                | 908             | 233                        | 0.8             | 0.6             | 0.9            | 108.0                      | 0.13                        | 0.5                        | 0.77          | 0.0005 |
| S32    | 23               | 60                | 845             | 174                        | 0.5             | 0.5             | 0.7            | 81.5                       | 0.10                        | 0.4                        | 0.59          | 0.0003 |
| S33    | 72               | 83                | 939             | 262                        | 0.9             | 0.7             | 1.0            | 121.6                      | 0.15                        | 0.6                        | 0.86          | 0.0005 |
| S34    | 79               | 70                | 845             | 244                        | 0.9             | 0.7             | 0.9            | 113.3                      | 0.14                        | 0.6                        | 0.80          | 0.0005 |
| S35    | 107              | 150               | 1127            | 409                        | 1.4             | 1.1             | 1.5            | 186.6                      | 0.23                        | 0.9                        | 1.31          | 0.0008 |
| S36    | 79               | 89                | 845             | 271                        | 0.9             | 0.7             | 1.0            | 124.9                      | 0.15                        | 0.6                        | 0.88          | 0.0005 |
| S37    | 85               | 87                | 751             | 268                        | 1.0             | 0.7             | 1.0            | 122.9                      | 0.15                        | 0.6                        | 0.86          | 0.0005 |
| S38    | 48               | 85                | 720             | 225                        | 0.7             | 0.6             | 0.8            | 103.0                      | 0.13                        | 0.5                        | 0.73          | 0.0004 |
| S39    | 51               | 93                | 876             | 250                        | 0.8             | 0.7             | 0.9            | 115.2                      | 0.14                        | 0.6                        | 0.82          | 0.0005 |
| S40    | 61               | 82                | 814             | 240                        | 0.8             | 0.6             | 0.9            | 110.6                      | 0.14                        | 0.5                        | 0.78          | 0.0005 |
| S41    | 31               | 66                | 814             | 188                        | 0.6             | 0.5             | 0.7            | 87.4                       | 0.11                        | 0.4                        | 0.63          | 0.0004 |
| S42    | 28               | 119               | 939             | 271                        | 0.8             | 0.7             | 1.0            | 123.5                      | 0.15                        | 0.6                        | 0.88          | 0.0005 |
| S43    | 61               | 65                | 908             | 224                        | 0.8             | 0.6             | 0.8            | 104.7                      | 0.13                        | 0.5                        | 0.75          | 0.0004 |
| S44    | 33               | 68                | 1002            | 208                        | 0.7             | 0.6             | 0.8            | 97.7                       | 0.12                        | 0.5                        | 0.70          | 0.0004 |
| S45    | 15               | 73                | 876             | 186                        | 0.5             | 0.5             | 0.7            | 86.7                       | 0.11                        | 0.4                        | 0.62          | 0.0004 |

|     |     |     |      |     |     |     |     |       |      |     |      |        |
|-----|-----|-----|------|-----|-----|-----|-----|-------|------|-----|------|--------|
| S46 | 56  | 60  | 908  | 211 | 0.7 | 0.6 | 0.8 | 99.2  | 0.12 | 0.5 | 0.71 | 0.0004 |
| S47 | 43  | 98  | 908  | 254 | 0.8 | 0.7 | 0.9 | 116.5 | 0.14 | 0.6 | 0.83 | 0.0005 |
| S48 | 101 | 128 | 845  | 350 | 1.2 | 0.9 | 1.3 | 158.9 | 0.19 | 0.8 | 1.11 | 0.0007 |
| S49 | 56  | 70  | 876  | 223 | 0.8 | 0.6 | 0.8 | 104.0 | 0.13 | 0.5 | 0.74 | 0.0004 |
| S50 | 46  | 68  | 908  | 213 | 0.7 | 0.6 | 0.8 | 99.3  | 0.12 | 0.5 | 0.71 | 0.0004 |
| S51 | 72  | 95  | 1189 | 299 | 1.0 | 0.8 | 1.1 | 139.2 | 0.17 | 0.7 | 0.99 | 0.0006 |
| S52 | 47  | 72  | 970  | 225 | 0.7 | 0.6 | 0.8 | 105.1 | 0.13 | 0.5 | 0.75 | 0.0005 |
| S53 | 63  | 61  | 814  | 213 | 0.7 | 0.6 | 0.8 | 99.2  | 0.12 | 0.5 | 0.70 | 0.0004 |
| S54 | 62  | 43  | 783  | 184 | 0.7 | 0.5 | 0.7 | 86.6  | 0.11 | 0.4 | 0.62 | 0.0004 |
| S55 | 47  | 51  | 939  | 192 | 0.6 | 0.5 | 0.7 | 90.8  | 0.11 | 0.4 | 0.65 | 0.0004 |
| S56 | 43  | 61  | 814  | 194 | 0.6 | 0.5 | 0.7 | 90.4  | 0.11 | 0.4 | 0.65 | 0.0004 |
| S57 | 23  | 67  | 1064 | 201 | 0.6 | 0.5 | 0.8 | 94.7  | 0.12 | 0.5 | 0.68 | 0.0004 |
| S58 | 32  | 71  | 845  | 199 | 0.6 | 0.5 | 0.7 | 92.6  | 0.11 | 0.5 | 0.66 | 0.0004 |
| S59 | 48  | 60  | 1002 | 211 | 0.7 | 0.6 | 0.8 | 99.4  | 0.12 | 0.5 | 0.71 | 0.0004 |
| S60 | 38  | 77  | 908  | 218 | 0.7 | 0.6 | 0.8 | 101.3 | 0.12 | 0.5 | 0.72 | 0.0004 |
| S61 | 68  | 67  | 814  | 227 | 0.8 | 0.6 | 0.8 | 105.5 | 0.13 | 0.5 | 0.75 | 0.0005 |
| S62 | 54  | 60  | 783  | 201 | 0.7 | 0.5 | 0.7 | 93.5  | 0.11 | 0.5 | 0.66 | 0.0004 |
| S63 | 49  | 78  | 1002 | 238 | 0.8 | 0.6 | 0.9 | 111.0 | 0.14 | 0.5 | 0.79 | 0.0005 |
| S64 | 72  | 80  | 1064 | 267 | 0.9 | 0.7 | 1.0 | 124.8 | 0.15 | 0.6 | 0.89 | 0.0005 |
| S65 | 72  | 100 | 876  | 282 | 1.0 | 0.8 | 1.0 | 129.4 | 0.16 | 0.6 | 0.91 | 0.0006 |
| S66 | 107 | 146 | 1158 | 406 | 1.4 | 1.1 | 1.5 | 185.4 | 0.23 | 0.9 | 1.31 | 0.0008 |
| S67 | 72  | 138 | 1002 | 346 | 1.1 | 0.9 | 1.3 | 157.5 | 0.19 | 0.8 | 1.11 | 0.0007 |
| S68 | 54  | 108 | 1096 | 293 | 0.9 | 0.8 | 1.1 | 135.3 | 0.17 | 0.7 | 0.96 | 0.0006 |
| S69 | 64  | 91  | 970  | 268 | 0.9 | 0.7 | 1.0 | 124.1 | 0.15 | 0.6 | 0.88 | 0.0005 |
| S70 | 38  | 123 | 1002 | 292 | 0.9 | 0.8 | 1.1 | 133.3 | 0.16 | 0.7 | 0.95 | 0.0006 |
| S71 | 75  | 99  | 1002 | 294 | 1.0 | 0.8 | 1.1 | 135.7 | 0.17 | 0.7 | 0.96 | 0.0006 |
| S72 | 38  | 69  | 845  | 202 | 0.6 | 0.5 | 0.8 | 94.0  | 0.12 | 0.5 | 0.67 | 0.0004 |
| S73 | 101 | 107 | 1033 | 334 | 1.2 | 0.9 | 1.2 | 153.9 | 0.19 | 0.8 | 1.09 | 0.0007 |
| S74 | 57  | 85  | 1002 | 255 | 0.8 | 0.7 | 0.9 | 118.6 | 0.15 | 0.6 | 0.84 | 0.0005 |
| S75 | 93  | 80  | 1189 | 298 | 1.1 | 0.8 | 1.1 | 139.6 | 0.17 | 0.7 | 0.99 | 0.0006 |
| S76 | 43  | 192 | 814  | 381 | 1.1 | 1.0 | 1.4 | 169.3 | 0.21 | 0.8 | 1.19 | 0.0007 |
| S77 | 63  | 126 | 908  | 313 | 1.0 | 0.8 | 1.1 | 142.3 | 0.17 | 0.7 | 1.01 | 0.0006 |
| S78 | 90  | 111 | 751  | 307 | 1.1 | 0.8 | 1.1 | 139.6 | 0.17 | 0.7 | 0.98 | 0.0006 |
| S79 | 73  | 83  | 970  | 266 | 0.9 | 0.7 | 1.0 | 123.5 | 0.15 | 0.6 | 0.88 | 0.0005 |
| S80 | 73  | 92  | 720  | 260 | 0.9 | 0.7 | 0.9 | 118.8 | 0.15 | 0.6 | 0.84 | 0.0005 |
| S81 | 52  | 82  | 876  | 237 | 0.8 | 0.6 | 0.9 | 109.4 | 0.13 | 0.5 | 0.78 | 0.0005 |
| S82 | 33  | 103 | 845  | 245 | 0.8 | 0.7 | 0.9 | 112.1 | 0.14 | 0.5 | 0.80 | 0.0005 |
| S83 | 44  | 64  | 876  | 203 | 0.7 | 0.5 | 0.8 | 95.0  | 0.12 | 0.5 | 0.68 | 0.0004 |
| S84 | 56  | 89  | 908  | 252 | 0.8 | 0.7 | 0.9 | 116.4 | 0.14 | 0.6 | 0.83 | 0.0005 |
| S85 | 54  | 96  | 845  | 256 | 0.8 | 0.7 | 0.9 | 117.6 | 0.14 | 0.6 | 0.83 | 0.0005 |
| S86 | 38  | 73  | 876  | 211 | 0.7 | 0.6 | 0.8 | 98.0  | 0.12 | 0.5 | 0.70 | 0.0004 |
| S87 | 38  | 85  | 814  | 223 | 0.7 | 0.6 | 0.8 | 102.6 | 0.13 | 0.5 | 0.73 | 0.0004 |
| S88 | 75  | 56  | 814  | 218 | 0.8 | 0.6 | 0.8 | 101.8 | 0.12 | 0.5 | 0.72 | 0.0004 |
| S89 | 52  | 67  | 720  | 203 | 0.7 | 0.5 | 0.7 | 93.7  | 0.11 | 0.5 | 0.66 | 0.0004 |
| S90 | 43  | 51  | 845  | 181 | 0.6 | 0.5 | 0.7 | 85.3  | 0.10 | 0.4 | 0.61 | 0.0004 |
| S91 | 70  | 77  | 845  | 246 | 0.9 | 0.7 | 0.9 | 113.8 | 0.14 | 0.6 | 0.81 | 0.0005 |
| S92 | 43  | 63  | 814  | 195 | 0.6 | 0.5 | 0.7 | 91.1  | 0.11 | 0.4 | 0.65 | 0.0004 |
| S93 | 53  | 69  | 814  | 214 | 0.7 | 0.6 | 0.8 | 99.6  | 0.12 | 0.5 | 0.71 | 0.0004 |
| S94 | 56  | 78  | 814  | 229 | 0.8 | 0.6 | 0.8 | 105.9 | 0.13 | 0.5 | 0.75 | 0.0005 |
| S95 | 77  | 75  | 876  | 251 | 0.9 | 0.7 | 0.9 | 116.7 | 0.14 | 0.6 | 0.83 | 0.0005 |
| S96 | 86  | 83  | 783  | 266 | 1.0 | 0.7 | 1.0 | 122.3 | 0.15 | 0.6 | 0.86 | 0.0005 |

|      |     |     |      |     |     |     |     |       |      |     |      |        |
|------|-----|-----|------|-----|-----|-----|-----|-------|------|-----|------|--------|
| S97  | 52  | 79  | 876  | 232 | 0.8 | 0.6 | 0.9 | 107.5 | 0.13 | 0.5 | 0.76 | 0.0005 |
| S98  | 43  | 68  | 814  | 203 | 0.7 | 0.5 | 0.8 | 94.3  | 0.12 | 0.5 | 0.67 | 0.0004 |
| S99  | 42  | 89  | 1002 | 246 | 0.8 | 0.7 | 0.9 | 113.9 | 0.14 | 0.6 | 0.81 | 0.0005 |
| S100 | 54  | 79  | 751  | 225 | 0.8 | 0.6 | 0.8 | 103.7 | 0.13 | 0.5 | 0.73 | 0.0004 |
| S101 | 48  | 67  | 876  | 211 | 0.7 | 0.6 | 0.8 | 98.6  | 0.12 | 0.5 | 0.70 | 0.0004 |
| S102 | 42  | 89  | 783  | 230 | 0.7 | 0.6 | 0.8 | 105.4 | 0.13 | 0.5 | 0.75 | 0.0005 |
| S103 | 61  | 76  | 845  | 235 | 0.8 | 0.6 | 0.9 | 108.7 | 0.13 | 0.5 | 0.77 | 0.0005 |
| S104 | 41  | 82  | 908  | 228 | 0.7 | 0.6 | 0.8 | 105.6 | 0.13 | 0.5 | 0.75 | 0.0005 |
| S105 | 35  | 69  | 845  | 199 | 0.6 | 0.5 | 0.7 | 92.6  | 0.11 | 0.5 | 0.66 | 0.0004 |
| S106 | 35  | 71  | 970  | 210 | 0.7 | 0.6 | 0.8 | 98.4  | 0.12 | 0.5 | 0.71 | 0.0004 |
| S107 | 61  | 74  | 814  | 229 | 0.8 | 0.6 | 0.8 | 106.0 | 0.13 | 0.5 | 0.75 | 0.0005 |
| S108 | 51  | 64  | 1002 | 219 | 0.7 | 0.6 | 0.8 | 103.0 | 0.13 | 0.5 | 0.74 | 0.0004 |
| S109 | 75  | 75  | 876  | 250 | 0.9 | 0.7 | 0.9 | 116.1 | 0.14 | 0.6 | 0.82 | 0.0005 |
| S110 | 46  | 80  | 876  | 228 | 0.7 | 0.6 | 0.8 | 105.4 | 0.13 | 0.5 | 0.75 | 0.0005 |
| S111 | 72  | 175 | 1189 | 413 | 1.3 | 1.1 | 1.5 | 187.3 | 0.23 | 0.9 | 1.32 | 0.0008 |
| S112 | 47  | 113 | 845  | 274 | 0.9 | 0.7 | 1.0 | 124.7 | 0.15 | 0.6 | 0.88 | 0.0005 |
| S113 | 64  | 132 | 657  | 304 | 1.0 | 0.8 | 1.1 | 136.3 | 0.17 | 0.7 | 0.96 | 0.0006 |
| S114 | 75  | 80  | 657  | 240 | 0.9 | 0.6 | 0.9 | 110.1 | 0.13 | 0.5 | 0.77 | 0.0005 |
| S115 | 61  | 61  | 751  | 205 | 0.7 | 0.6 | 0.8 | 95.5  | 0.12 | 0.5 | 0.68 | 0.0004 |
| S116 | 27  | 91  | 939  | 230 | 0.7 | 0.6 | 0.9 | 106.0 | 0.13 | 0.5 | 0.76 | 0.0005 |
| S117 | 90  | 54  | 845  | 233 | 0.9 | 0.6 | 0.9 | 109.2 | 0.13 | 0.5 | 0.77 | 0.0005 |
| S118 | 30  | 63  | 876  | 187 | 0.6 | 0.5 | 0.7 | 87.6  | 0.11 | 0.4 | 0.63 | 0.0004 |
| S119 | 53  | 103 | 876  | 268 | 0.9 | 0.7 | 1.0 | 122.8 | 0.15 | 0.6 | 0.87 | 0.0005 |
| S120 | 42  | 77  | 970  | 226 | 0.7 | 0.6 | 0.8 | 105.5 | 0.13 | 0.5 | 0.76 | 0.0005 |
| S121 | 57  | 77  | 720  | 223 | 0.8 | 0.6 | 0.8 | 102.4 | 0.13 | 0.5 | 0.72 | 0.0004 |
| S122 | 47  | 86  | 814  | 233 | 0.8 | 0.6 | 0.9 | 107.0 | 0.13 | 0.5 | 0.76 | 0.0005 |
| S123 | 63  | 97  | 751  | 259 | 0.9 | 0.7 | 0.9 | 118.3 | 0.15 | 0.6 | 0.83 | 0.0005 |
| S124 | 52  | 72  | 1002 | 232 | 0.8 | 0.6 | 0.9 | 108.7 | 0.13 | 0.5 | 0.78 | 0.0005 |
| S125 | 131 | 95  | 626  | 316 | 1.2 | 0.9 | 1.1 | 143.8 | 0.18 | 0.7 | 1.00 | 0.0006 |
| S126 | 74  | 147 | 908  | 355 | 1.2 | 1.0 | 1.3 | 160.5 | 0.20 | 0.8 | 1.13 | 0.0007 |
| S127 | 90  | 116 | 908  | 326 | 1.1 | 0.9 | 1.2 | 148.8 | 0.18 | 0.7 | 1.05 | 0.0006 |
| S128 | 62  | 116 | 626  | 275 | 0.9 | 0.7 | 1.0 | 124.1 | 0.15 | 0.6 | 0.87 | 0.0005 |
| S129 | 51  | 172 | 626  | 345 | 1.1 | 0.9 | 1.2 | 153.0 | 0.19 | 0.8 | 1.07 | 0.0007 |
| S130 | 128 | 162 | 939  | 432 | 1.5 | 1.2 | 1.6 | 195.7 | 0.24 | 1.0 | 1.37 | 0.0008 |
| S131 | 65  | 101 | 595  | 255 | 0.9 | 0.7 | 0.9 | 115.4 | 0.14 | 0.6 | 0.81 | 0.0005 |
| S132 | 42  | 102 | 908  | 257 | 0.8 | 0.7 | 1.0 | 117.9 | 0.14 | 0.6 | 0.84 | 0.0005 |
| S133 | 44  | 89  | 908  | 241 | 0.8 | 0.7 | 0.9 | 111.2 | 0.14 | 0.5 | 0.79 | 0.0005 |
| S134 | 48  | 117 | 657  | 267 | 0.9 | 0.7 | 1.0 | 120.1 | 0.15 | 0.6 | 0.85 | 0.0005 |
| S135 | 73  | 113 | 563  | 278 | 0.9 | 0.8 | 1.0 | 125.2 | 0.15 | 0.6 | 0.88 | 0.0005 |
| S136 | 72  | 102 | 908  | 287 | 1.0 | 0.8 | 1.1 | 131.9 | 0.16 | 0.6 | 0.93 | 0.0006 |
| S137 | 63  | 113 | 1002 | 302 | 1.0 | 0.8 | 1.1 | 138.3 | 0.17 | 0.7 | 0.98 | 0.0006 |
| S138 | 59  | 119 | 1033 | 308 | 1.0 | 0.8 | 1.1 | 141.3 | 0.17 | 0.7 | 1.00 | 0.0006 |
| S139 | 65  | 101 | 908  | 280 | 0.9 | 0.8 | 1.0 | 128.5 | 0.16 | 0.6 | 0.91 | 0.0006 |
| S140 | 51  | 100 | 1033 | 274 | 0.9 | 0.7 | 1.0 | 126.3 | 0.15 | 0.6 | 0.90 | 0.0005 |
| S141 | 40  | 107 | 1189 | 284 | 0.9 | 0.8 | 1.1 | 131.8 | 0.16 | 0.6 | 0.94 | 0.0006 |
| S142 | 31  | 77  | 970  | 215 | 0.7 | 0.6 | 0.8 | 100.4 | 0.12 | 0.5 | 0.72 | 0.0004 |
| S143 | 54  | 82  | 908  | 241 | 0.8 | 0.7 | 0.9 | 111.6 | 0.14 | 0.5 | 0.79 | 0.0005 |
| S144 | 64  | 71  | 1033 | 245 | 0.8 | 0.7 | 0.9 | 114.9 | 0.14 | 0.6 | 0.82 | 0.0005 |
| S145 | 42  | 83  | 845  | 226 | 0.7 | 0.6 | 0.8 | 104.1 | 0.13 | 0.5 | 0.74 | 0.0004 |
| S146 | 54  | 68  | 1002 | 228 | 0.8 | 0.6 | 0.9 | 107.1 | 0.13 | 0.5 | 0.77 | 0.0005 |
| S147 | 42  | 68  | 845  | 204 | 0.7 | 0.6 | 0.8 | 95.0  | 0.12 | 0.5 | 0.68 | 0.0004 |

|      |     |     |      |     |     |     |     |       |      |     |      |        |
|------|-----|-----|------|-----|-----|-----|-----|-------|------|-----|------|--------|
| S148 | 44  | 54  | 1096 | 207 | 0.7 | 0.6 | 0.8 | 98.3  | 0.12 | 0.5 | 0.71 | 0.0004 |
| S149 | 57  | 91  | 751  | 245 | 0.8 | 0.7 | 0.9 | 112.0 | 0.14 | 0.5 | 0.79 | 0.0005 |
| S150 | 40  | 67  | 970  | 210 | 0.7 | 0.6 | 0.8 | 98.5  | 0.12 | 0.5 | 0.71 | 0.0004 |
| S151 | 59  | 70  | 1002 | 236 | 0.8 | 0.6 | 0.9 | 110.6 | 0.14 | 0.5 | 0.79 | 0.0005 |
| S152 | 41  | 77  | 1033 | 230 | 0.7 | 0.6 | 0.9 | 107.5 | 0.13 | 0.5 | 0.77 | 0.0005 |
| S153 | 30  | 80  | 1033 | 224 | 0.7 | 0.6 | 0.8 | 104.6 | 0.13 | 0.5 | 0.75 | 0.0004 |
| S154 | 36  | 67  | 908  | 202 | 0.6 | 0.5 | 0.8 | 94.5  | 0.12 | 0.5 | 0.68 | 0.0004 |
| S155 | 52  | 65  | 1064 | 227 | 0.8 | 0.6 | 0.9 | 107.1 | 0.13 | 0.5 | 0.77 | 0.0005 |
| S156 | 46  | 68  | 1064 | 225 | 0.7 | 0.6 | 0.8 | 105.9 | 0.13 | 0.5 | 0.76 | 0.0005 |
| S157 | 38  | 73  | 1221 | 236 | 0.7 | 0.6 | 0.9 | 111.6 | 0.14 | 0.5 | 0.81 | 0.0005 |
| S158 | 57  | 67  | 1002 | 230 | 0.8 | 0.6 | 0.9 | 107.8 | 0.13 | 0.5 | 0.77 | 0.0005 |
| S159 | 49  | 65  | 814  | 205 | 0.7 | 0.6 | 0.8 | 95.4  | 0.12 | 0.5 | 0.68 | 0.0004 |
| S160 | 63  | 76  | 876  | 239 | 0.8 | 0.6 | 0.9 | 110.9 | 0.14 | 0.5 | 0.79 | 0.0005 |
| S161 | 57  | 56  | 970  | 212 | 0.7 | 0.6 | 0.8 | 99.9  | 0.12 | 0.5 | 0.71 | 0.0004 |
| S162 | 44  | 33  | 1127 | 178 | 0.6 | 0.5 | 0.7 | 86.6  | 0.11 | 0.4 | 0.63 | 0.0004 |
| S163 | 40  | 73  | 751  | 202 | 0.7 | 0.5 | 0.7 | 93.2  | 0.11 | 0.5 | 0.66 | 0.0004 |
| S164 | 25  | 75  | 751  | 189 | 0.6 | 0.5 | 0.7 | 87.3  | 0.11 | 0.4 | 0.62 | 0.0004 |
| S165 | 35  | 59  | 376  | 148 | 0.5 | 0.4 | 0.5 | 66.9  | 0.08 | 0.3 | 0.47 | 0.0003 |
| S166 | 57  | 54  | 626  | 182 | 0.6 | 0.5 | 0.7 | 84.3  | 0.10 | 0.4 | 0.60 | 0.0004 |
| S167 | 49  | 87  | 939  | 247 | 0.8 | 0.7 | 0.9 | 114.0 | 0.14 | 0.6 | 0.81 | 0.0005 |
| S168 | 47  | 91  | 814  | 240 | 0.8 | 0.6 | 0.9 | 110.2 | 0.14 | 0.5 | 0.78 | 0.0005 |
| S169 | 77  | 95  | 1096 | 296 | 1.0 | 0.8 | 1.1 | 137.4 | 0.17 | 0.7 | 0.98 | 0.0006 |
| S170 | 62  | 82  | 908  | 248 | 0.8 | 0.7 | 0.9 | 115.0 | 0.14 | 0.6 | 0.82 | 0.0005 |
| S171 | 69  | 69  | 1002 | 244 | 0.8 | 0.7 | 0.9 | 114.5 | 0.14 | 0.6 | 0.82 | 0.0005 |
| S172 | 104 | 128 | 1127 | 373 | 1.3 | 1.0 | 1.4 | 171.4 | 0.21 | 0.8 | 1.21 | 0.0007 |
| S173 | 58  | 86  | 1002 | 258 | 0.9 | 0.7 | 1.0 | 119.9 | 0.15 | 0.6 | 0.85 | 0.0005 |
| S174 | 78  | 106 | 1221 | 324 | 1.1 | 0.9 | 1.2 | 150.2 | 0.18 | 0.7 | 1.07 | 0.0006 |
| S175 | 46  | 82  | 1096 | 247 | 0.8 | 0.7 | 0.9 | 115.6 | 0.14 | 0.6 | 0.83 | 0.0005 |
| S176 | 53  | 69  | 814  | 214 | 0.7 | 0.6 | 0.8 | 99.3  | 0.12 | 0.5 | 0.71 | 0.0004 |
| S177 | 54  | 80  | 908  | 238 | 0.8 | 0.6 | 0.9 | 110.4 | 0.14 | 0.5 | 0.79 | 0.0005 |
| S178 | 78  | 73  | 845  | 247 | 0.9 | 0.7 | 0.9 | 114.5 | 0.14 | 0.6 | 0.81 | 0.0005 |
| S179 | 74  | 116 | 1189 | 331 | 1.1 | 0.9 | 1.2 | 152.9 | 0.19 | 0.8 | 1.09 | 0.0007 |
| S180 | 46  | 55  | 876  | 192 | 0.6 | 0.5 | 0.7 | 90.1  | 0.11 | 0.4 | 0.65 | 0.0004 |
| S181 | 58  | 87  | 1064 | 265 | 0.9 | 0.7 | 1.0 | 123.2 | 0.15 | 0.6 | 0.88 | 0.0005 |
| S182 | 51  | 72  | 970  | 229 | 0.8 | 0.6 | 0.9 | 106.8 | 0.13 | 0.5 | 0.76 | 0.0005 |
| S183 | 33  | 30  | 407  | 108 | 0.4 | 0.3 | 0.4 | 50.2  | 0.06 | 0.2 | 0.36 | 0.0002 |
| S184 | 37  | 77  | 595  | 193 | 0.6 | 0.5 | 0.7 | 88.1  | 0.11 | 0.4 | 0.62 | 0.0004 |
| S185 | 86  | 85  | 814  | 270 | 1.0 | 0.7 | 1.0 | 124.6 | 0.15 | 0.6 | 0.88 | 0.0005 |
| S186 | 52  | 60  | 563  | 181 | 0.6 | 0.5 | 0.7 | 83.1  | 0.10 | 0.4 | 0.59 | 0.0004 |
| S187 | 48  | 83  | 814  | 229 | 0.7 | 0.6 | 0.8 | 105.6 | 0.13 | 0.5 | 0.75 | 0.0005 |
| S188 | 63  | 74  | 845  | 234 | 0.8 | 0.6 | 0.9 | 108.4 | 0.13 | 0.5 | 0.77 | 0.0005 |
| S189 | 46  | 82  | 1315 | 264 | 0.8 | 0.7 | 1.0 | 124.3 | 0.15 | 0.6 | 0.90 | 0.0005 |
| S190 | 42  | 79  | 845  | 220 | 0.7 | 0.6 | 0.8 | 101.6 | 0.12 | 0.5 | 0.72 | 0.0004 |
| S191 | 30  | 68  | 845  | 192 | 0.6 | 0.5 | 0.7 | 89.5  | 0.11 | 0.4 | 0.64 | 0.0004 |
| S192 | 31  | 67  | 1283 | 225 | 0.7 | 0.6 | 0.9 | 107.3 | 0.13 | 0.5 | 0.78 | 0.0005 |
| S193 | 36  | 56  | 908  | 186 | 0.6 | 0.5 | 0.7 | 87.8  | 0.11 | 0.4 | 0.63 | 0.0004 |
| S194 | 30  | 47  | 845  | 161 | 0.5 | 0.4 | 0.6 | 76.5  | 0.09 | 0.4 | 0.55 | 0.0003 |
| S195 | 49  | 48  | 908  | 187 | 0.6 | 0.5 | 0.7 | 88.7  | 0.11 | 0.4 | 0.64 | 0.0004 |
| S196 | 62  | 96  | 876  | 266 | 0.9 | 0.7 | 1.0 | 122.3 | 0.15 | 0.6 | 0.87 | 0.0005 |
| S197 | 82  | 111 | 1158 | 329 | 1.1 | 0.9 | 1.2 | 152.1 | 0.19 | 0.7 | 1.08 | 0.0007 |
| S198 | 79  | 113 | 1315 | 342 | 1.1 | 0.9 | 1.3 | 158.8 | 0.19 | 0.8 | 1.13 | 0.0007 |

|      |     |     |      |     |     |     |     |       |      |     |      |        |
|------|-----|-----|------|-----|-----|-----|-----|-------|------|-----|------|--------|
| S199 | 86  | 97  | 1221 | 320 | 1.1 | 0.9 | 1.2 | 148.8 | 0.18 | 0.7 | 1.06 | 0.0006 |
| S200 | 49  | 77  | 1158 | 249 | 0.8 | 0.7 | 0.9 | 116.9 | 0.14 | 0.6 | 0.84 | 0.0005 |
| S201 | 111 | 158 | 1127 | 424 | 1.4 | 1.1 | 1.5 | 193.2 | 0.24 | 0.9 | 1.36 | 0.0008 |
| S202 | 64  | 53  | 1064 | 222 | 0.8 | 0.6 | 0.8 | 105.2 | 0.13 | 0.5 | 0.75 | 0.0005 |
| S203 | 49  | 57  | 970  | 205 | 0.7 | 0.6 | 0.8 | 96.9  | 0.12 | 0.5 | 0.69 | 0.0004 |
| S204 | 57  | 79  | 1221 | 263 | 0.9 | 0.7 | 1.0 | 123.9 | 0.15 | 0.6 | 0.89 | 0.0005 |
| S205 | 56  | 91  | 1252 | 283 | 0.9 | 0.8 | 1.1 | 132.2 | 0.16 | 0.6 | 0.95 | 0.0006 |
| S206 | 65  | 86  | 1064 | 271 | 0.9 | 0.7 | 1.0 | 126.1 | 0.15 | 0.6 | 0.90 | 0.0005 |
| S207 | 86  | 90  | 1002 | 292 | 1.0 | 0.8 | 1.1 | 135.4 | 0.17 | 0.7 | 0.96 | 0.0006 |
| S208 | 74  | 78  | 1002 | 263 | 0.9 | 0.7 | 1.0 | 122.4 | 0.15 | 0.6 | 0.87 | 0.0005 |
| S209 | 94  | 110 | 1127 | 337 | 1.2 | 0.9 | 1.2 | 155.8 | 0.19 | 0.8 | 1.10 | 0.0007 |
| S210 | 79  | 77  | 908  | 259 | 0.9 | 0.7 | 1.0 | 120.3 | 0.15 | 0.6 | 0.85 | 0.0005 |
| S211 | 74  | 82  | 814  | 255 | 0.9 | 0.7 | 0.9 | 117.4 | 0.14 | 0.6 | 0.83 | 0.0005 |
| S212 | 59  | 71  | 876  | 229 | 0.8 | 0.6 | 0.8 | 106.5 | 0.13 | 0.5 | 0.76 | 0.0005 |
| S213 | 65  | 57  | 720  | 202 | 0.7 | 0.5 | 0.7 | 94.1  | 0.12 | 0.5 | 0.67 | 0.0004 |
| S214 | 37  | 53  | 563  | 156 | 0.5 | 0.4 | 0.6 | 72.1  | 0.09 | 0.4 | 0.51 | 0.0003 |
| S215 | 68  | 40  | 563  | 169 | 0.6 | 0.5 | 0.6 | 78.8  | 0.10 | 0.4 | 0.55 | 0.0003 |
| S216 | 68  | 83  | 1002 | 263 | 0.9 | 0.7 | 1.0 | 122.5 | 0.15 | 0.6 | 0.87 | 0.0005 |
| S217 | 84  | 65  | 1002 | 254 | 0.9 | 0.7 | 0.9 | 119.1 | 0.15 | 0.6 | 0.85 | 0.0005 |
| S218 | 89  | 114 | 1096 | 336 | 1.1 | 0.9 | 1.2 | 154.9 | 0.19 | 0.8 | 1.10 | 0.0007 |
| S219 | 52  | 93  | 1252 | 282 | 0.9 | 0.8 | 1.1 | 131.7 | 0.16 | 0.6 | 0.94 | 0.0006 |
| S220 | 54  | 78  | 1033 | 246 | 0.8 | 0.7 | 0.9 | 114.8 | 0.14 | 0.6 | 0.82 | 0.0005 |
| S221 | 62  | 81  | 1064 | 260 | 0.9 | 0.7 | 1.0 | 121.2 | 0.15 | 0.6 | 0.86 | 0.0005 |
| S222 | 57  | 80  | 939  | 244 | 0.8 | 0.7 | 0.9 | 113.3 | 0.14 | 0.6 | 0.81 | 0.0005 |
| S223 | 53  | 82  | 1002 | 248 | 0.8 | 0.7 | 0.9 | 115.1 | 0.14 | 0.6 | 0.82 | 0.0005 |
| S224 | 53  | 80  | 1064 | 249 | 0.8 | 0.7 | 0.9 | 116.2 | 0.14 | 0.6 | 0.83 | 0.0005 |
| S225 | 74  | 83  | 1002 | 270 | 0.9 | 0.7 | 1.0 | 125.6 | 0.15 | 0.6 | 0.89 | 0.0005 |
| S226 | 83  | 82  | 1033 | 279 | 1.0 | 0.8 | 1.0 | 129.9 | 0.16 | 0.6 | 0.92 | 0.0006 |
| S227 | 43  | 76  | 814  | 215 | 0.7 | 0.6 | 0.8 | 99.4  | 0.12 | 0.5 | 0.71 | 0.0004 |
| S228 | 47  | 68  | 939  | 216 | 0.7 | 0.6 | 0.8 | 101.1 | 0.12 | 0.5 | 0.72 | 0.0004 |
| S229 | 51  | 81  | 751  | 224 | 0.7 | 0.6 | 0.8 | 103.0 | 0.13 | 0.5 | 0.73 | 0.0004 |
| S230 | 61  | 82  | 939  | 250 | 0.8 | 0.7 | 0.9 | 115.7 | 0.14 | 0.6 | 0.82 | 0.0005 |
| S231 | 63  | 105 | 1252 | 309 | 1.0 | 0.8 | 1.2 | 143.7 | 0.18 | 0.7 | 1.03 | 0.0006 |
| S232 | 86  | 110 | 1096 | 328 | 1.1 | 0.9 | 1.2 | 151.1 | 0.19 | 0.7 | 1.07 | 0.0006 |
| S233 | 93  | 106 | 1221 | 338 | 1.2 | 0.9 | 1.2 | 156.6 | 0.19 | 0.8 | 1.11 | 0.0007 |
| S234 | 78  | 85  | 1158 | 288 | 1.0 | 0.8 | 1.1 | 134.7 | 0.17 | 0.7 | 0.96 | 0.0006 |
| S235 | 126 | 101 | 1096 | 355 | 1.3 | 1.0 | 1.3 | 164.2 | 0.20 | 0.8 | 1.16 | 0.0007 |
| S236 | 90  | 92  | 1096 | 306 | 1.1 | 0.8 | 1.1 | 142.2 | 0.17 | 0.7 | 1.01 | 0.0006 |
| S237 | 85  | 77  | 970  | 270 | 1.0 | 0.7 | 1.0 | 125.7 | 0.15 | 0.6 | 0.89 | 0.0005 |
| S238 | 61  | 65  | 970  | 228 | 0.8 | 0.6 | 0.8 | 107.0 | 0.13 | 0.5 | 0.76 | 0.0005 |
| S239 | 62  | 69  | 939  | 233 | 0.8 | 0.6 | 0.9 | 108.7 | 0.13 | 0.5 | 0.77 | 0.0005 |
| S240 | 49  | 89  | 1096 | 261 | 0.8 | 0.7 | 1.0 | 121.4 | 0.15 | 0.6 | 0.87 | 0.0005 |
| S241 | 72  | 94  | 1189 | 297 | 1.0 | 0.8 | 1.1 | 138.5 | 0.17 | 0.7 | 0.99 | 0.0006 |
| S242 | 67  | 95  | 1221 | 296 | 1.0 | 0.8 | 1.1 | 138.0 | 0.17 | 0.7 | 0.98 | 0.0006 |
| S243 | 68  | 106 | 1221 | 313 | 1.0 | 0.8 | 1.2 | 145.4 | 0.18 | 0.7 | 1.04 | 0.0006 |
| S244 | 90  | 85  | 1252 | 308 | 1.1 | 0.8 | 1.1 | 144.5 | 0.18 | 0.7 | 1.03 | 0.0006 |
| S245 | 77  | 112 | 1158 | 325 | 1.1 | 0.9 | 1.2 | 150.3 | 0.18 | 0.7 | 1.07 | 0.0006 |
| S246 | 62  | 83  | 689  | 234 | 0.8 | 0.6 | 0.9 | 107.0 | 0.13 | 0.5 | 0.75 | 0.0005 |
| S247 | 56  | 118 | 814  | 287 | 0.9 | 0.8 | 1.0 | 130.2 | 0.16 | 0.6 | 0.92 | 0.0006 |
| S248 | 65  | 97  | 908  | 274 | 0.9 | 0.7 | 1.0 | 126.1 | 0.15 | 0.6 | 0.89 | 0.0005 |
| S249 | 70  | 82  | 1064 | 270 | 0.9 | 0.7 | 1.0 | 125.7 | 0.15 | 0.6 | 0.89 | 0.0005 |

|      |     |     |      |     |     |     |     |       |      |     |      |        |
|------|-----|-----|------|-----|-----|-----|-----|-------|------|-----|------|--------|
| S250 | 46  | 79  | 1064 | 241 | 0.8 | 0.7 | 0.9 | 112.6 | 0.14 | 0.6 | 0.81 | 0.0005 |
| S251 | 44  | 80  | 1033 | 238 | 0.8 | 0.6 | 0.9 | 111.2 | 0.14 | 0.5 | 0.80 | 0.0005 |
| S252 | 46  | 80  | 1064 | 243 | 0.8 | 0.7 | 0.9 | 113.3 | 0.14 | 0.6 | 0.81 | 0.0005 |
| S253 | 49  | 100 | 1033 | 272 | 0.9 | 0.7 | 1.0 | 125.7 | 0.15 | 0.6 | 0.90 | 0.0005 |
| S254 | 67  | 89  | 876  | 262 | 0.9 | 0.7 | 1.0 | 120.7 | 0.15 | 0.6 | 0.85 | 0.0005 |
| S255 | 74  | 118 | 1002 | 320 | 1.1 | 0.9 | 1.2 | 146.4 | 0.18 | 0.7 | 1.04 | 0.0006 |
| S256 | 83  | 121 | 1221 | 350 | 1.2 | 0.9 | 1.3 | 161.4 | 0.20 | 0.8 | 1.14 | 0.0007 |
| S257 | 91  | 89  | 1127 | 306 | 1.1 | 0.8 | 1.1 | 142.4 | 0.17 | 0.7 | 1.01 | 0.0006 |
| S258 | 79  | 111 | 1002 | 315 | 1.1 | 0.9 | 1.2 | 144.8 | 0.18 | 0.7 | 1.02 | 0.0006 |
| S259 | 37  | 86  | 876  | 228 | 0.7 | 0.6 | 0.8 | 105.0 | 0.13 | 0.5 | 0.75 | 0.0005 |
| S260 | 79  | 81  | 845  | 260 | 0.9 | 0.7 | 1.0 | 120.2 | 0.15 | 0.6 | 0.85 | 0.0005 |
| S261 | 56  | 57  | 626  | 185 | 0.7 | 0.5 | 0.7 | 85.7  | 0.11 | 0.4 | 0.61 | 0.0004 |
| S262 | 110 | 136 | 1409 | 413 | 1.4 | 1.1 | 1.5 | 190.7 | 0.23 | 0.9 | 1.35 | 0.0008 |
| S263 | 74  | 108 | 1127 | 315 | 1.1 | 0.9 | 1.2 | 145.7 | 0.18 | 0.7 | 1.03 | 0.0006 |
| S264 | 61  | 72  | 1315 | 265 | 0.9 | 0.7 | 1.0 | 125.5 | 0.15 | 0.6 | 0.90 | 0.0005 |
| S265 | 86  | 106 | 939  | 310 | 1.1 | 0.8 | 1.1 | 142.2 | 0.17 | 0.7 | 1.00 | 0.0006 |
| S266 | 74  | 83  | 1064 | 275 | 0.9 | 0.7 | 1.0 | 128.1 | 0.16 | 0.6 | 0.91 | 0.0006 |
| S267 | 94  | 92  | 1189 | 317 | 1.1 | 0.9 | 1.2 | 147.8 | 0.18 | 0.7 | 1.05 | 0.0006 |
| S268 | 69  | 104 | 970  | 293 | 1.0 | 0.8 | 1.1 | 134.8 | 0.17 | 0.7 | 0.95 | 0.0006 |
| S269 | 100 | 150 | 1096 | 399 | 1.3 | 1.1 | 1.4 | 181.9 | 0.22 | 0.9 | 1.28 | 0.0008 |
| S270 | 58  | 166 | 626  | 343 | 1.1 | 0.9 | 1.2 | 152.5 | 0.19 | 0.7 | 1.07 | 0.0007 |
| S271 | 77  | 99  | 1064 | 300 | 1.0 | 0.8 | 1.1 | 138.8 | 0.17 | 0.7 | 0.98 | 0.0006 |
| S272 | 56  | 96  | 1096 | 278 | 0.9 | 0.7 | 1.0 | 128.7 | 0.16 | 0.6 | 0.92 | 0.0006 |
| S273 | 49  | 88  | 908  | 245 | 0.8 | 0.7 | 0.9 | 113.0 | 0.14 | 0.6 | 0.80 | 0.0005 |
| S274 | 63  | 81  | 1064 | 261 | 0.9 | 0.7 | 1.0 | 121.8 | 0.15 | 0.6 | 0.87 | 0.0005 |
| S275 | 56  | 96  | 1064 | 275 | 0.9 | 0.7 | 1.0 | 127.2 | 0.16 | 0.6 | 0.91 | 0.0005 |
| S276 | 54  | 91  | 1064 | 267 | 0.9 | 0.7 | 1.0 | 123.9 | 0.15 | 0.6 | 0.88 | 0.0005 |
| S277 | 62  | 91  | 1064 | 274 | 0.9 | 0.7 | 1.0 | 127.1 | 0.16 | 0.6 | 0.91 | 0.0005 |
| S278 | 79  | 88  | 939  | 277 | 1.0 | 0.7 | 1.0 | 128.0 | 0.16 | 0.6 | 0.91 | 0.0005 |
| S279 | 91  | 117 | 1002 | 336 | 1.2 | 0.9 | 1.2 | 154.2 | 0.19 | 0.8 | 1.09 | 0.0007 |
| S280 | 62  | 111 | 1002 | 298 | 1.0 | 0.8 | 1.1 | 136.8 | 0.17 | 0.7 | 0.97 | 0.0006 |
| S281 | 99  | 98  | 908  | 309 | 1.1 | 0.8 | 1.1 | 142.2 | 0.17 | 0.7 | 1.00 | 0.0006 |
| S282 | 74  | 97  | 876  | 281 | 1.0 | 0.8 | 1.0 | 129.0 | 0.16 | 0.6 | 0.91 | 0.0006 |
| S283 | 58  | 96  | 939  | 267 | 0.9 | 0.7 | 1.0 | 123.2 | 0.15 | 0.6 | 0.87 | 0.0005 |
| S284 | 126 | 106 | 939  | 350 | 1.3 | 0.9 | 1.3 | 160.9 | 0.20 | 0.8 | 1.13 | 0.0007 |
| S285 | 99  | 118 | 939  | 339 | 1.2 | 0.9 | 1.2 | 155.3 | 0.19 | 0.8 | 1.09 | 0.0007 |
| S286 | 74  | 89  | 939  | 274 | 0.9 | 0.7 | 1.0 | 126.7 | 0.16 | 0.6 | 0.90 | 0.0005 |
| S287 | 63  | 86  | 1064 | 269 | 0.9 | 0.7 | 1.0 | 125.0 | 0.15 | 0.6 | 0.89 | 0.0005 |
| S288 | 53  | 84  | 908  | 244 | 0.8 | 0.7 | 0.9 | 112.8 | 0.14 | 0.6 | 0.80 | 0.0005 |
| S289 | 75  | 77  | 1096 | 270 | 0.9 | 0.7 | 1.0 | 126.3 | 0.15 | 0.6 | 0.90 | 0.0005 |
| S290 | 84  | 73  | 1002 | 266 | 0.9 | 0.7 | 1.0 | 124.0 | 0.15 | 0.6 | 0.88 | 0.0005 |
| S291 | 106 | 102 | 939  | 325 | 1.2 | 0.9 | 1.2 | 149.4 | 0.18 | 0.7 | 1.05 | 0.0006 |
| S292 | 82  | 74  | 1252 | 284 | 1.0 | 0.8 | 1.1 | 133.6 | 0.16 | 0.7 | 0.95 | 0.0006 |
| S293 | 62  | 82  | 939  | 251 | 0.8 | 0.7 | 0.9 | 116.6 | 0.14 | 0.6 | 0.83 | 0.0005 |
| S294 | 128 | 65  | 1221 | 315 | 1.2 | 0.9 | 1.2 | 148.6 | 0.18 | 0.7 | 1.05 | 0.0006 |
| S295 | 89  | 80  | 1189 | 295 | 1.0 | 0.8 | 1.1 | 138.4 | 0.17 | 0.7 | 0.98 | 0.0006 |
| S296 | 32  | 76  | 1096 | 224 | 0.7 | 0.6 | 0.8 | 105.4 | 0.13 | 0.5 | 0.76 | 0.0005 |
| S297 | 54  | 68  | 1158 | 241 | 0.8 | 0.7 | 0.9 | 113.8 | 0.14 | 0.6 | 0.82 | 0.0005 |
| S298 | 52  | 91  | 1064 | 263 | 0.9 | 0.7 | 1.0 | 122.3 | 0.15 | 0.6 | 0.87 | 0.0005 |
| S299 | 74  | 72  | 1158 | 267 | 0.9 | 0.7 | 1.0 | 125.4 | 0.15 | 0.6 | 0.89 | 0.0005 |
| S300 | 52  | 67  | 1440 | 259 | 0.8 | 0.7 | 1.0 | 123.5 | 0.15 | 0.6 | 0.89 | 0.0005 |

|      |     |     |      |     |     |     |     |       |      |     |      |        |
|------|-----|-----|------|-----|-----|-----|-----|-------|------|-----|------|--------|
| S301 | 79  | 95  | 1189 | 306 | 1.0 | 0.8 | 1.1 | 142.4 | 0.17 | 0.7 | 1.01 | 0.0006 |
| S302 | 40  | 60  | 595  | 171 | 0.6 | 0.5 | 0.6 | 78.9  | 0.10 | 0.4 | 0.56 | 0.0003 |
| S303 | 52  | 67  | 626  | 196 | 0.7 | 0.5 | 0.7 | 90.3  | 0.11 | 0.4 | 0.64 | 0.0004 |
| S304 | 38  | 52  | 939  | 185 | 0.6 | 0.5 | 0.7 | 87.6  | 0.11 | 0.4 | 0.63 | 0.0004 |
| S305 | 40  | 54  | 657  | 167 | 0.6 | 0.5 | 0.6 | 77.6  | 0.10 | 0.4 | 0.55 | 0.0003 |
| S306 | 65  | 56  | 783  | 205 | 0.7 | 0.6 | 0.8 | 95.9  | 0.12 | 0.5 | 0.68 | 0.0004 |
| S307 | 114 | 100 | 814  | 320 | 1.2 | 0.9 | 1.2 | 146.4 | 0.18 | 0.7 | 1.03 | 0.0006 |
| S308 | 51  | 80  | 876  | 232 | 0.8 | 0.6 | 0.9 | 107.4 | 0.13 | 0.5 | 0.76 | 0.0005 |
| S309 | 89  | 77  | 751  | 256 | 0.9 | 0.7 | 0.9 | 118.2 | 0.14 | 0.6 | 0.83 | 0.0005 |
| S310 | 78  | 69  | 845  | 241 | 0.9 | 0.7 | 0.9 | 112.0 | 0.14 | 0.5 | 0.79 | 0.0005 |
| S311 | 114 | 163 | 1127 | 434 | 1.5 | 1.2 | 1.6 | 197.3 | 0.24 | 1.0 | 1.39 | 0.0008 |
| S312 | 111 | 102 | 751  | 315 | 1.2 | 0.9 | 1.1 | 143.9 | 0.18 | 0.7 | 1.01 | 0.0006 |
| S313 | 47  | 91  | 876  | 245 | 0.8 | 0.7 | 0.9 | 112.8 | 0.14 | 0.6 | 0.80 | 0.0005 |
| S314 | 46  | 83  | 1158 | 253 | 0.8 | 0.7 | 1.0 | 118.6 | 0.15 | 0.6 | 0.85 | 0.0005 |
| S315 | 64  | 102 | 939  | 282 | 0.9 | 0.8 | 1.0 | 129.7 | 0.16 | 0.6 | 0.92 | 0.0006 |
| S316 | 79  | 76  | 1127 | 274 | 1.0 | 0.7 | 1.0 | 128.3 | 0.16 | 0.6 | 0.91 | 0.0006 |
| S317 | 89  | 79  | 1064 | 284 | 1.0 | 0.8 | 1.0 | 132.5 | 0.16 | 0.7 | 0.94 | 0.0006 |
| S318 | 54  | 88  | 1252 | 276 | 0.9 | 0.7 | 1.0 | 129.4 | 0.16 | 0.6 | 0.93 | 0.0006 |
| S319 | 74  | 94  | 1315 | 310 | 1.0 | 0.8 | 1.2 | 145.0 | 0.18 | 0.7 | 1.04 | 0.0006 |
| S320 | 73  | 104 | 1158 | 311 | 1.0 | 0.8 | 1.1 | 143.9 | 0.18 | 0.7 | 1.02 | 0.0006 |
| S321 | 67  | 92  | 1096 | 283 | 0.9 | 0.8 | 1.0 | 131.4 | 0.16 | 0.6 | 0.94 | 0.0006 |
| S322 | 80  | 95  | 1064 | 297 | 1.0 | 0.8 | 1.1 | 137.9 | 0.17 | 0.7 | 0.98 | 0.0006 |
| S323 | 69  | 59  | 970  | 229 | 0.8 | 0.6 | 0.9 | 107.5 | 0.13 | 0.5 | 0.77 | 0.0005 |
| S324 | 65  | 97  | 1221 | 298 | 1.0 | 0.8 | 1.1 | 138.9 | 0.17 | 0.7 | 0.99 | 0.0006 |
| S325 | 72  | 93  | 1064 | 287 | 1.0 | 0.8 | 1.1 | 133.1 | 0.16 | 0.7 | 0.95 | 0.0006 |
| S326 | 88  | 64  | 1221 | 273 | 1.0 | 0.7 | 1.0 | 129.1 | 0.16 | 0.6 | 0.92 | 0.0006 |
| S327 | 80  | 72  | 1096 | 268 | 0.9 | 0.7 | 1.0 | 125.7 | 0.15 | 0.6 | 0.89 | 0.0005 |
| S328 | 80  | 84  | 1064 | 283 | 1.0 | 0.8 | 1.0 | 131.7 | 0.16 | 0.6 | 0.94 | 0.0006 |
| S329 | 58  | 69  | 1158 | 245 | 0.8 | 0.7 | 0.9 | 115.7 | 0.14 | 0.6 | 0.83 | 0.0005 |
| S330 | 101 | 96  | 1471 | 352 | 1.2 | 1.0 | 1.3 | 165.2 | 0.20 | 0.8 | 1.18 | 0.0007 |
| S331 | 68  | 61  | 1158 | 244 | 0.8 | 0.7 | 0.9 | 115.6 | 0.14 | 0.6 | 0.83 | 0.0005 |
| S332 | 79  | 117 | 1096 | 331 | 1.1 | 0.9 | 1.2 | 152.3 | 0.19 | 0.7 | 1.08 | 0.0007 |
| S333 | 44  | 93  | 1252 | 274 | 0.9 | 0.7 | 1.0 | 128.3 | 0.16 | 0.6 | 0.92 | 0.0006 |
| S334 | 52  | 76  | 1064 | 242 | 0.8 | 0.7 | 0.9 | 113.5 | 0.14 | 0.6 | 0.81 | 0.0005 |
| S335 | 37  | 80  | 1221 | 246 | 0.8 | 0.7 | 0.9 | 115.7 | 0.14 | 0.6 | 0.83 | 0.0005 |
| S336 | 83  | 86  | 908  | 276 | 1.0 | 0.7 | 1.0 | 127.7 | 0.16 | 0.6 | 0.90 | 0.0005 |
| S337 | 90  | 88  | 1127 | 303 | 1.1 | 0.8 | 1.1 | 141.1 | 0.17 | 0.7 | 1.00 | 0.0006 |
| S338 | 70  | 97  | 1033 | 288 | 1.0 | 0.8 | 1.1 | 133.2 | 0.16 | 0.7 | 0.95 | 0.0006 |
| S339 | 84  | 97  | 1315 | 323 | 1.1 | 0.9 | 1.2 | 151.1 | 0.19 | 0.7 | 1.08 | 0.0006 |
| S340 | 70  | 87  | 1158 | 284 | 1.0 | 0.8 | 1.1 | 132.5 | 0.16 | 0.6 | 0.94 | 0.0006 |
| S341 | 79  | 90  | 970  | 282 | 1.0 | 0.8 | 1.0 | 130.5 | 0.16 | 0.6 | 0.92 | 0.0006 |
| S342 | 79  | 74  | 1096 | 270 | 0.9 | 0.7 | 1.0 | 126.3 | 0.15 | 0.6 | 0.90 | 0.0005 |
| S343 | 42  | 50  | 908  | 183 | 0.6 | 0.5 | 0.7 | 86.5  | 0.11 | 0.4 | 0.62 | 0.0004 |
| S344 | 88  | 62  | 814  | 239 | 0.9 | 0.6 | 0.9 | 111.2 | 0.14 | 0.5 | 0.78 | 0.0005 |
| S345 | 64  | 84  | 1158 | 274 | 0.9 | 0.7 | 1.0 | 128.2 | 0.16 | 0.6 | 0.92 | 0.0006 |
| S346 | 89  | 78  | 1002 | 278 | 1.0 | 0.7 | 1.0 | 129.2 | 0.16 | 0.6 | 0.92 | 0.0006 |
| S347 | 103 | 83  | 1033 | 300 | 1.1 | 0.8 | 1.1 | 139.7 | 0.17 | 0.7 | 0.99 | 0.0006 |
| S348 | 131 | 86  | 845  | 320 | 1.2 | 0.9 | 1.2 | 147.4 | 0.18 | 0.7 | 1.03 | 0.0006 |
| S349 | 70  | 76  | 970  | 254 | 0.9 | 0.7 | 0.9 | 118.4 | 0.15 | 0.6 | 0.84 | 0.0005 |
| S350 | 96  | 82  | 1002 | 291 | 1.0 | 0.8 | 1.1 | 135.4 | 0.17 | 0.7 | 0.96 | 0.0006 |
| S351 | 67  | 84  | 1002 | 264 | 0.9 | 0.7 | 1.0 | 122.6 | 0.15 | 0.6 | 0.87 | 0.0005 |

|         |      |      |       |       |     |     |     |       |      |      |      |         |
|---------|------|------|-------|-------|-----|-----|-----|-------|------|------|------|---------|
| S352    | 70   | 86   | 970   | 268   | 0.9 | 0.7 | 1.0 | 124.3 | 0.15 | 0.6  | 0.88 | 0.0005  |
| S353    | 73   | 86   | 908   | 266   | 0.9 | 0.7 | 1.0 | 122.9 | 0.15 | 0.6  | 0.87 | 0.0005  |
| S354    | 61   | 99   | 970   | 277   | 0.9 | 0.7 | 1.0 | 127.8 | 0.16 | 0.6  | 0.91 | 0.0005  |
| S355    | 82   | 69   | 783   | 241   | 0.9 | 0.7 | 0.9 | 111.7 | 0.14 | 0.5  | 0.79 | 0.0005  |
| S356    | 48   | 44   | 532   | 152   | 0.5 | 0.4 | 0.6 | 70.8  | 0.09 | 0.3  | 0.50 | 0.0003  |
| S357    | 38   | 41   | 626   | 145   | 0.5 | 0.4 | 0.5 | 68.1  | 0.08 | 0.3  | 0.49 | 0.0003  |
| S358    | 109  | 50   | 751   | 237   | 0.9 | 0.6 | 0.9 | 110.9 | 0.14 | 0.5  | 0.78 | 0.0005  |
| S359    | 62   | 52   | 939   | 209   | 0.7 | 0.6 | 0.8 | 98.7  | 0.12 | 0.5  | 0.70 | 0.0004  |
| S360    | 36   | 93   | 1064  | 250   | 0.8 | 0.7 | 0.9 | 116.1 | 0.14 | 0.6  | 0.83 | 0.0005  |
| S361    | 62   | 41   | 657   | 172   | 0.6 | 0.5 | 0.6 | 80.5  | 0.10 | 0.4  | 0.57 | 0.0003  |
| S362    | 43   | 99   | 814   | 247   | 0.8 | 0.7 | 0.9 | 112.9 | 0.14 | 0.6  | 0.80 | 0.0005  |
| S363    | 40   | 82   | 1064  | 239   | 0.8 | 0.6 | 0.9 | 111.7 | 0.14 | 0.5  | 0.80 | 0.0005  |
| S364    | 52   | 82   | 908   | 240   | 0.8 | 0.6 | 0.9 | 111.0 | 0.14 | 0.5  | 0.79 | 0.0005  |
| S365    | 56   | 66   | 1002  | 227   | 0.8 | 0.6 | 0.8 | 106.5 | 0.13 | 0.5  | 0.76 | 0.0005  |
| S366    | 42   | 69   | 876   | 208   | 0.7 | 0.6 | 0.8 | 96.8  | 0.12 | 0.5  | 0.69 | 0.0004  |
| S367    | 48   | 92   | 908   | 250   | 0.8 | 0.7 | 0.9 | 115.1 | 0.14 | 0.6  | 0.82 | 0.0005  |
| S368    | 42   | 52   | 939   | 189   | 0.6 | 0.5 | 0.7 | 89.3  | 0.11 | 0.4  | 0.64 | 0.0004  |
| S369    | 46   | 65   | 689   | 191   | 0.6 | 0.5 | 0.7 | 88.3  | 0.11 | 0.4  | 0.63 | 0.0004  |
| S370    | 36   | 93   | 1064  | 250   | 0.8 | 0.7 | 0.9 | 116.1 | 0.14 | 0.6  | 0.83 | 0.0005  |
| S371    | 65   | 59   | 783   | 210   | 0.7 | 0.6 | 0.8 | 97.9  | 0.12 | 0.5  | 0.69 | 0.0004  |
| S372    | 70   | 89   | 751   | 256   | 0.9 | 0.7 | 0.9 | 117.3 | 0.14 | 0.6  | 0.83 | 0.0005  |
| S373    | 63   | 56   | 1002  | 220   | 0.8 | 0.6 | 0.8 | 104.0 | 0.13 | 0.5  | 0.74 | 0.0004  |
| S374    | 37   | 76   | 970   | 220   | 0.7 | 0.6 | 0.8 | 102.5 | 0.13 | 0.5  | 0.73 | 0.0004  |
| S375    | 69   | 75   | 626   | 225   | 0.8 | 0.6 | 0.8 | 103.0 | 0.13 | 0.5  | 0.72 | 0.0004  |
| S376    | 52   | 55   | 689   | 183   | 0.6 | 0.5 | 0.7 | 85.3  | 0.10 | 0.4  | 0.61 | 0.0004  |
| S377    | 80   | 39   | 689   | 189   | 0.7 | 0.5 | 0.7 | 88.9  | 0.11 | 0.4  | 0.63 | 0.0004  |
| S378    | 75   | 46   | 876   | 208   | 0.8 | 0.6 | 0.8 | 98.4  | 0.12 | 0.5  | 0.70 | 0.0004  |
| S379    | 14   | 95   | 1127  | 237   | 0.7 | 0.6 | 0.9 | 110.1 | 0.14 | 0.5  | 0.79 | 0.0005  |
| S380    | 75   | 62   | 501   | 202   | 0.7 | 0.5 | 0.7 | 92.6  | 0.11 | 0.5  | 0.65 | 0.0004  |
| Average | 62   | 84   | 949   | 256   | 0.9 | 0.7 | 0.9 | 117.9 | 0.15 | 0.58 | 0.84 | 0.0005  |
| SD      | 21   | 23   | 172   | 51    | 0.2 | 0.1 | 0.2 | 22.2  | 0.03 | 0.11 | 0.16 | 0.0001  |
| Max     | 131  | 192  | 1471  | 434   | 1.5 | 1.2 | 1.6 | 197.3 | 0.24 | 0.97 | 1.39 | 0.0008  |
| Min     | 14   | 30   | 376   | 108   | 0.4 | 0.3 | 0.4 | 68.1  | 0.06 | 0.25 | 0.36 | 0.0002  |
| WD      | 33.0 | 45.0 | 412.0 | 370.0 | <1  | <1  | 1.0 | 58.0  | 1.0  | 1.0  | 0.3  | 0.00029 |
